# Supplementary material for: Risk Factors for Abdominal Aortic Aneurysm in Population-Based Studies: A Systematic Review and Meta-Analysis
Source: Preprints.org preprint supplement (doi:10.20944/preprints201810.0636.v1), 2018-10-26
Supplement: Supplementary file 1 [file supplementary]

Table S1. Included studies in Meta-analysis

| Reference Authors, title, journal  no# | |
| --- | --- |
| 1 | Li K, Zhang K, Li T, Zhai S. Primary results of abdominal aortic aneurysm screening in the at-risk residents in middle China. BMC Cardiovasc Disord. 2018 Apr 3;18(1):60. |
| 2 | Gianfagna F, Veronesi G, Tozzi M, Tarallo A, Borchini R, Ferrario MM, Bertù L, Montonati A, Castelli P; RoCAV (Risk of Cardiovascular diseases and abdominal aortic Aneurysm in Varese) Project Investigators. Prevalence of abdominal aortic aneurysms in the general population and in subgroups at high cardiovascular risk in Italy. Results of the RoCAV population based study. Eur J Vasc Endovasc Surg. 2018 Mar 3;55:633-639. |
| 3 | Kilic S, Saracoglu E, Cekici Y. Clinical Efficacy of Transthoracic Echocardiography for Screening Abdominal Aortic Aneurysm in Turkish Patients. Acta Cardiol Sin. 2018 Mar;34(2):137-143. |
| 4 | Dereziński TL, Fórmankiewicz B, Migdalski A, Brazis P, Jakubowski G, Woda Ł, Jawień A. The prevalence of abdominal aortic aneurysms in the rural/urban population in central Poland - Gniewkowo Aortic Study. Kardiol Pol. 2017 Apr 10;75(7):705-710. |
| 5 | Corrado G, Durante A, Genchi V, Trabattoni L, Beretta S, Rovelli E, Foglia-Manzillo G, Ferrari G. Prevalence of previously undiagnosed abdominal aortic aneurysms in the area of Como: the ComoCuore "looking for AAA" ultrasonography screening. Int J Cardiovasc Imaging. 2016 Aug;32(8):1213-7. |
| 6 | Makrygiannis G, Labalue P, Erpicum M, Schlitz M, Seidel L, El Hachemi M, Gangolf M, Albert A, Defraigne JO, Lindholt JS, Sakalihasan N. Extending abnominal aortic aneurysm detection to older age older age groups: preliminary results from the Liege screening programme. Ann Vasc Surg. 2016 Oct;36:55-63. |
| 7 | Kent KC, Zwolak RM, Egorova NN, Riles TS, Manganaro A, Moskowitz AJ, Gelijns AC, Greco G. Analysis of risk factors for abdominal aortic aneurysm in a cohort of more than 3 million individuals. J Vasc Surg. 2010 Sep;52(3):539-48. |
| 8 | Palombo D, Lucertini G, Pane B, Mazzei R, Spinella G, Brasesco PC. District-based abdominal aortic aneurysm screening in population aged 65 years and older. J Cardiovasc Surg. (Torino) 2010 Dec;51(6):777-82. |
| 9 | Singh K, Bønaa KH, Jacobsen BK, Bjørk L, Solberg S. Prevalence of and risk factors for abdominal aortic aneurysms in a population-based study : The Tromsø Study. Am J Epidemiol. 2001 Aug 1;154(3):236-44. |
| 10 | Al-Zahrani HA, Rawas M, Maimani A, Gasab M, Aba al Khail BA. Screening for abdominal aortic aneurysm in the Jeddah area, western Saudi Arabia. Cardiovasc Surg. 1996 Feb;4(1):87-92. |
| 11 | Alcorn HG, Wolfson SK Jr, Sutton-Tyrrell K, Kuller LH, O'Leary D. Risk factors for abdominal aortic aneurysms in older adults enrolled in The Cardiovascular Health Study. Arterioscler Thromb Vasc Bio.l 1996 Aug;16(8):963-70. |
| 12 | Kanagasabay R, Gajraj H, Pointon L, Scott RA. Co-morbidity in patients with abdominal aortic aneurysm. J Med Screen. 1996 Sep 10;3(4):208-10. |
| 13 | Simoni G, Pastorino C, Perrone R, Ardia A, Gianrossi R, De Cian F, Cittadini G Jr, Baiardi A, Bachi V. Screening for abdominal aortic aneurysms and associated risk factors in a general population. Eur J Vasc Endovasc Surg. 1995 Aug 1;10(2):207-10. Erratum in: Eur J Vasc Endovasc Surg 2014 Jan 1. |
| 14 | Nicholls EA, Norman PE, Lawrence-Brown MM, Goodman MA, Pedersen B. Screening for abdominal aortic aneurysms in Western Australia. Aust N Z J Surg. 1992 Jun 17;62(11):858-61. |
